# Supplementary material for: Damming-Induced Hydrogeomorphic Transition in Downstream Channel and Delta: A Case Study of the Yellow River, China
Source: MDPI journal article supplement (doi:10.3390/w14132079), 2022-06-29
Supplement: s1 [file s1]

# Supplementary Material

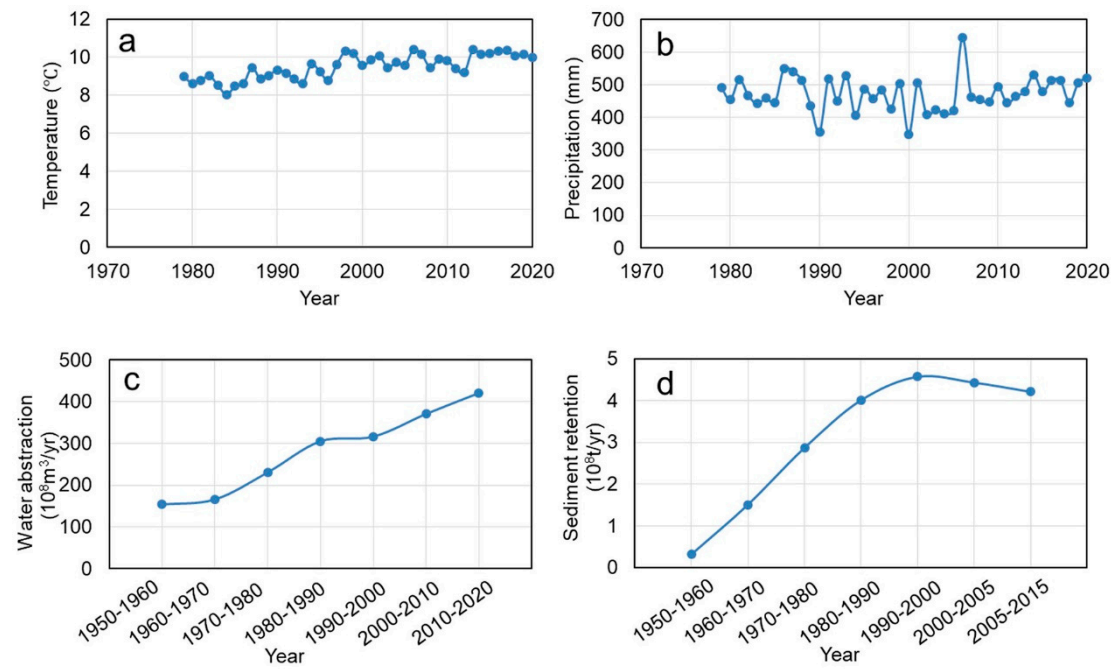

**Figure S1.** Environmental changes in the Yellow River Basin. (a) Temperature, (b) Precipitation, (c) Water abstraction (d) Sediment retention by water-soil conservation practices.
