# Supplementary material for: Damming-Induced Hydrogeomorphic Transition in Downstream Channel and Delta: A Case Study of the Yellow River, China
Source: MDPI journal article supplement (doi:10.3390/w14132079), 2022-06-29
Supplement: s1 [file s1]

Archive with 1 entries (1 files):
- water-1780944-supplementary.pdf
